# Supplementary material
Source: publisher figshare collection journal article supplement (https://diabetesjournals.figshare.com/articles/dataset/_/28259861)

**Supplementary Figure S2. Simulation Participant Actions by Scenario and Sequence of Presentation**

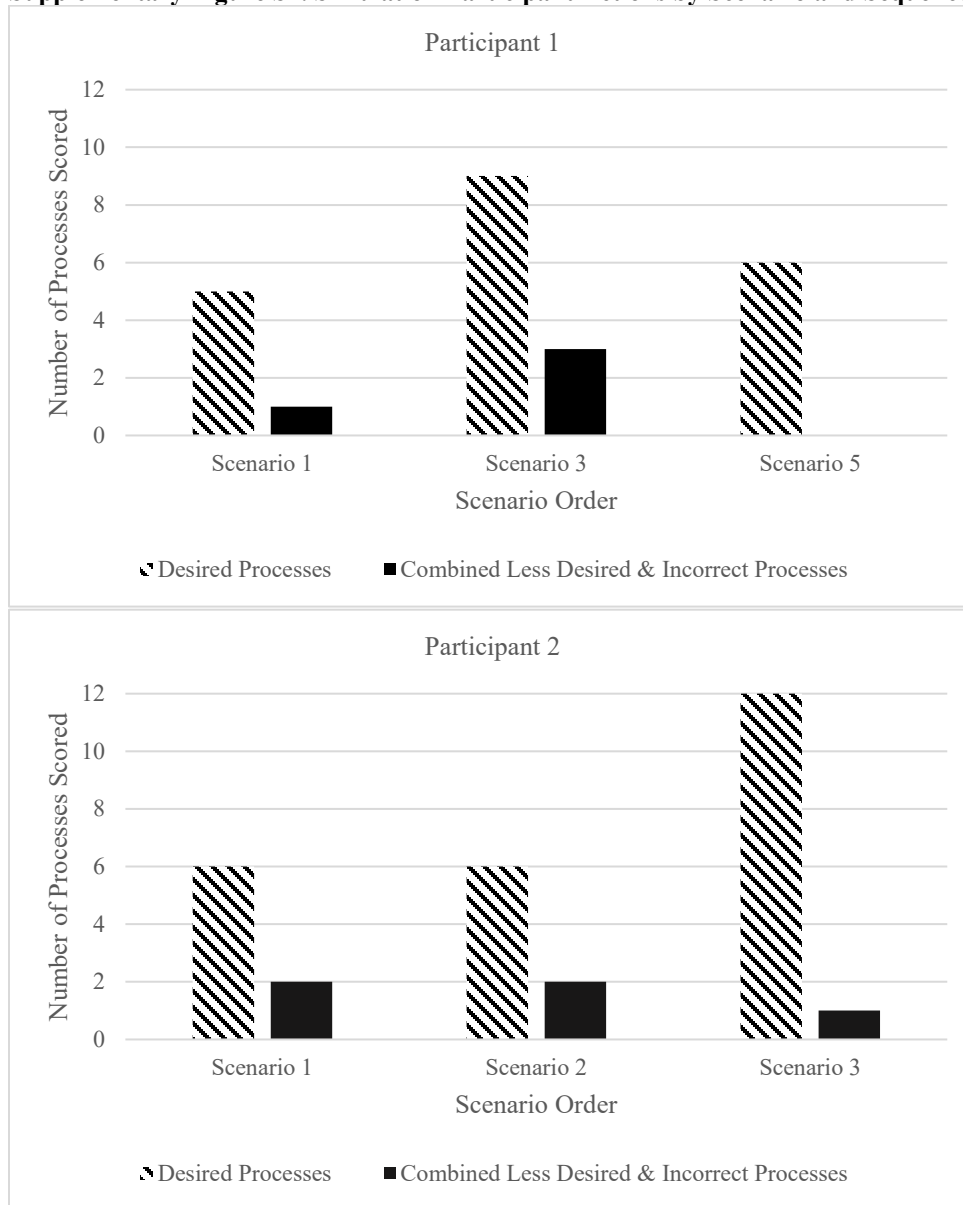

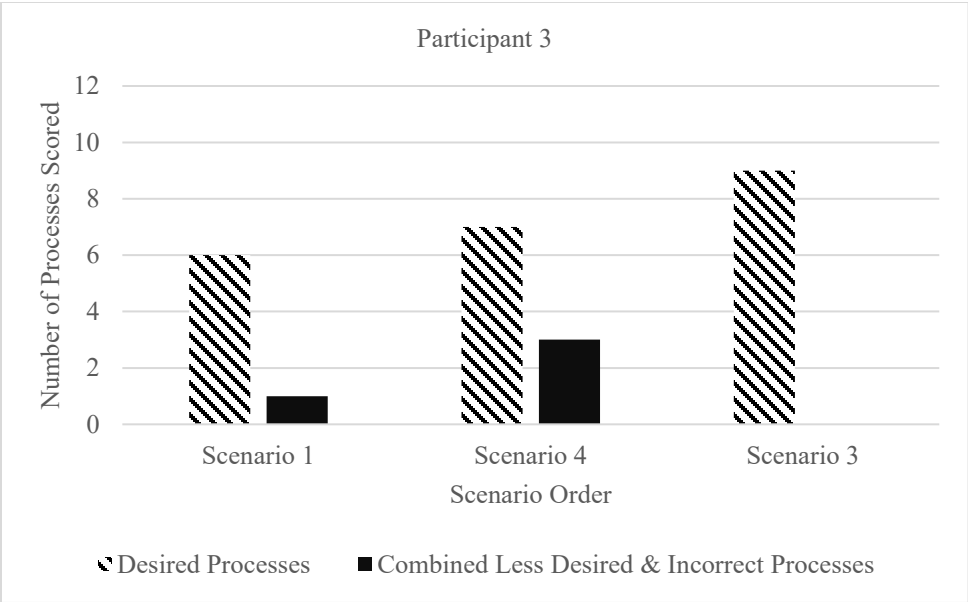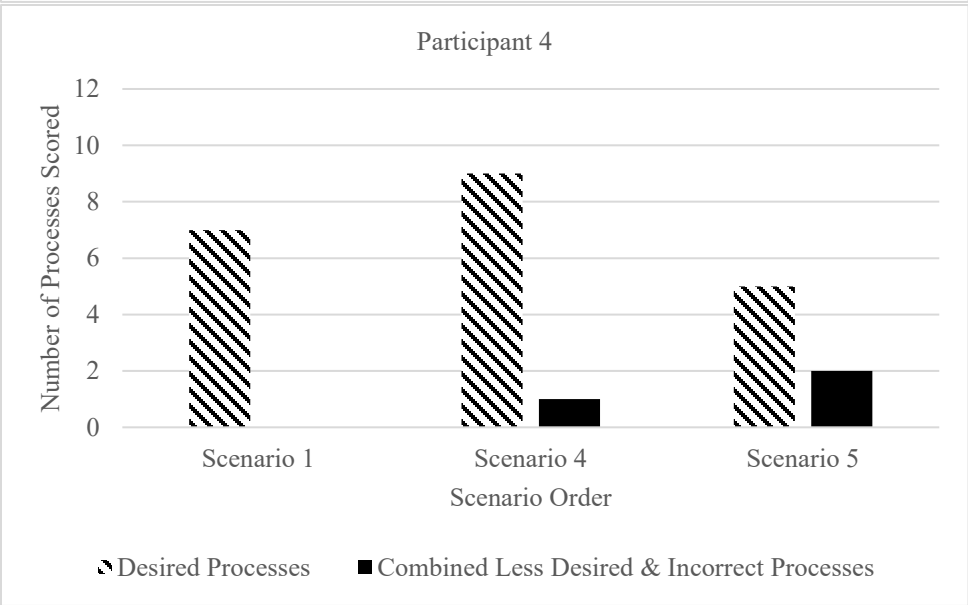

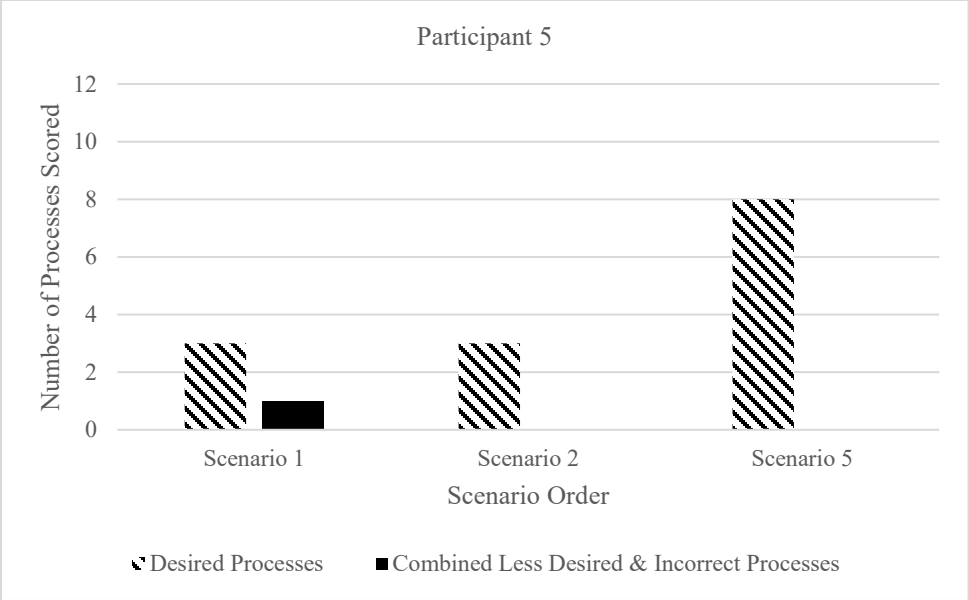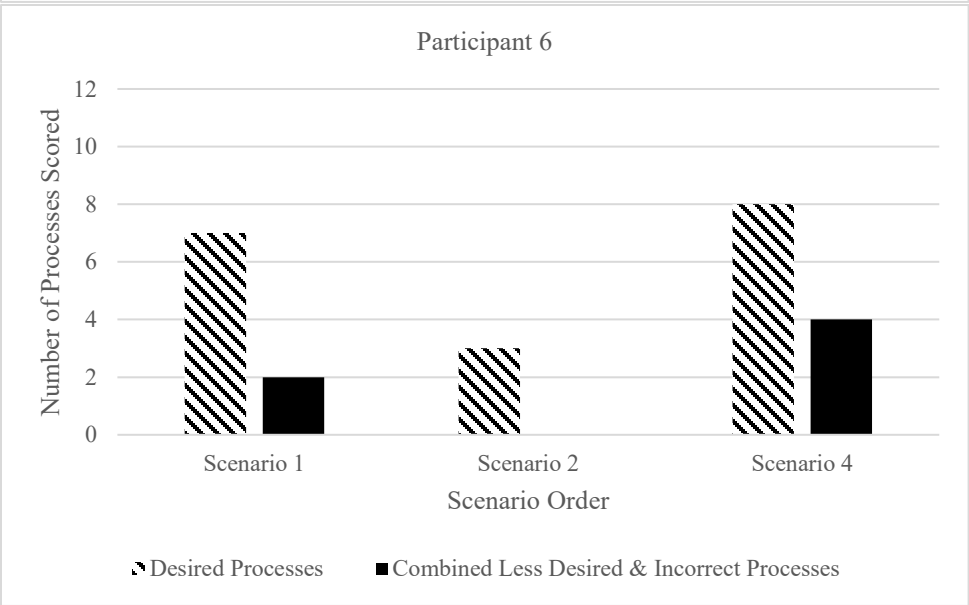

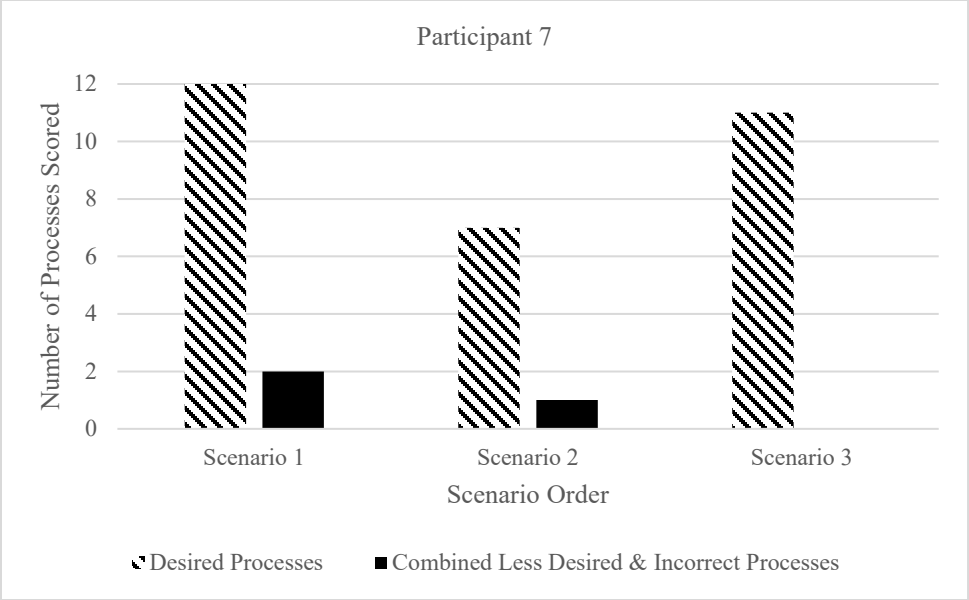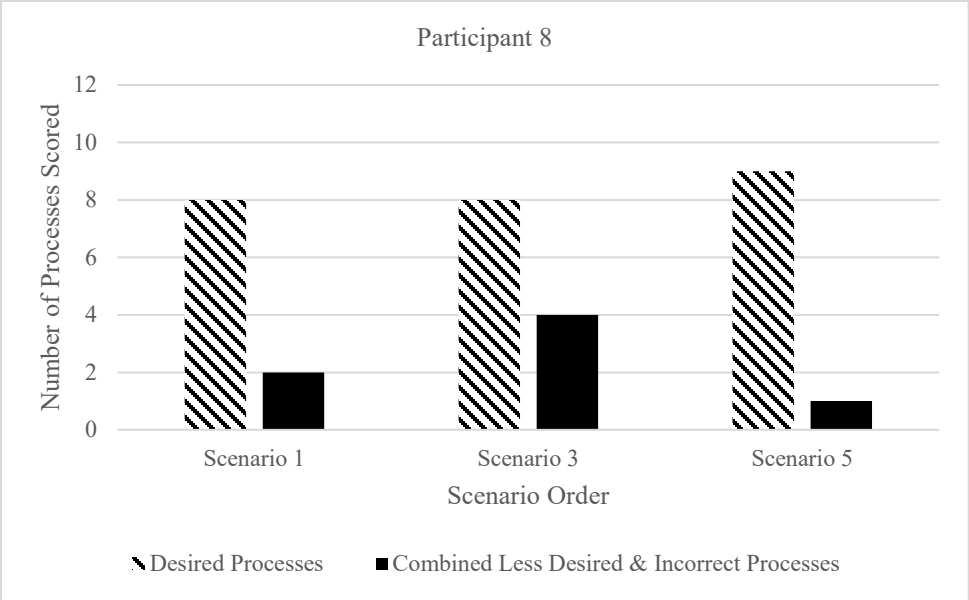

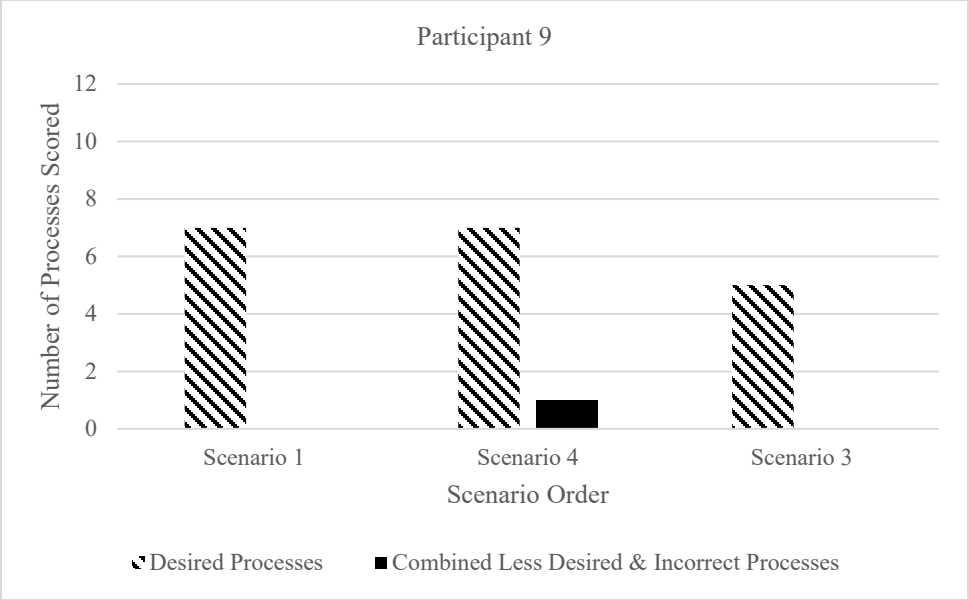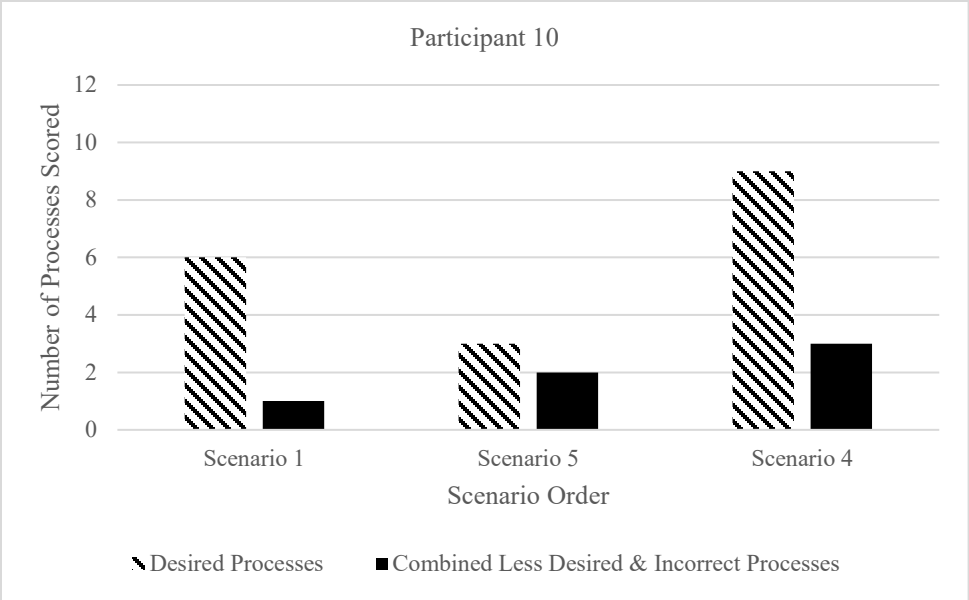

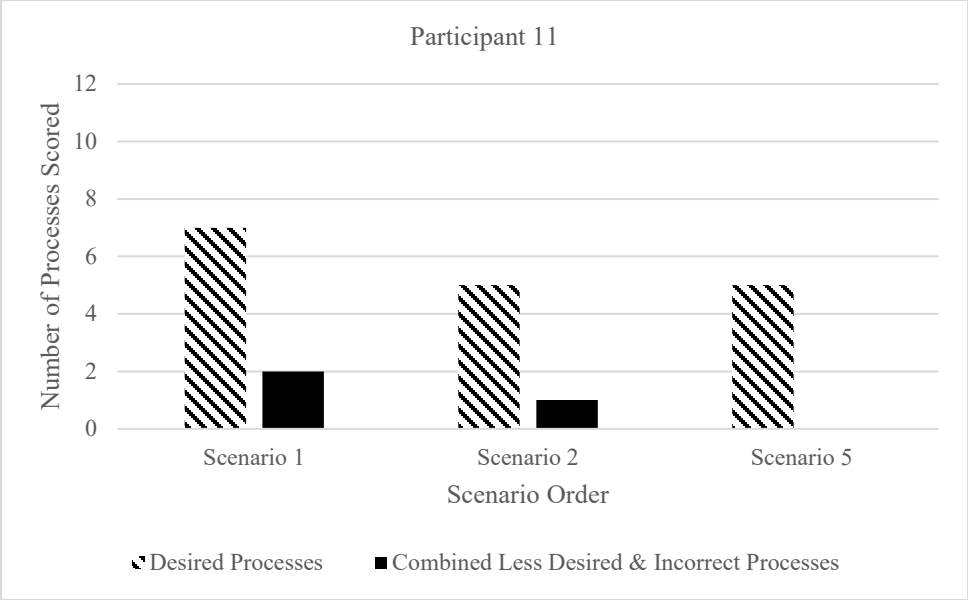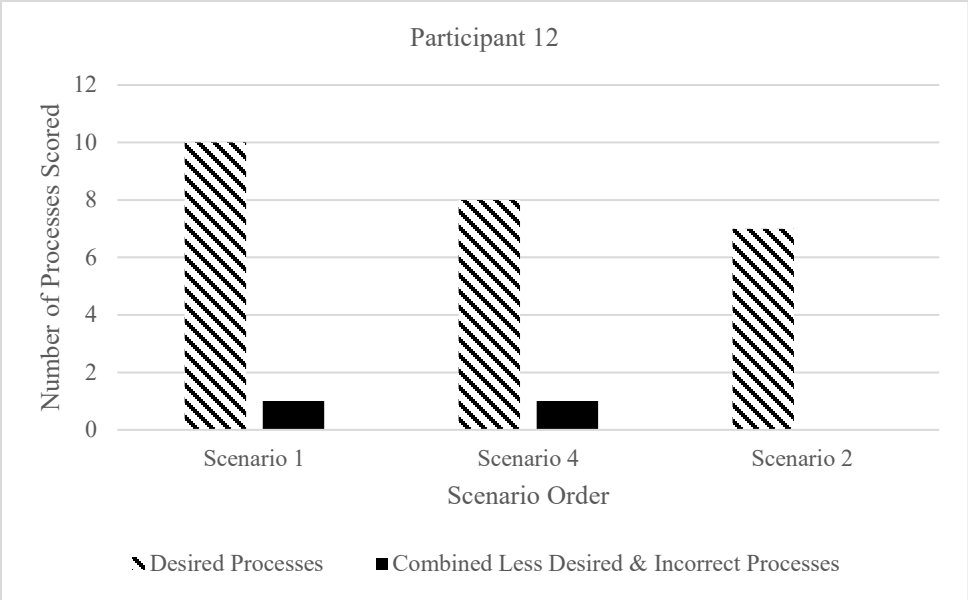

Supplement: Supplementary file 1 [file 1]
