# Supplementary material
Source: publisher figshare collection journal article supplement (https://diabetesjournals.figshare.com/articles/dataset/_/28259861)

**Supplementary Figure S1: Example Simulation Scenario Process Map for Scenario 1**

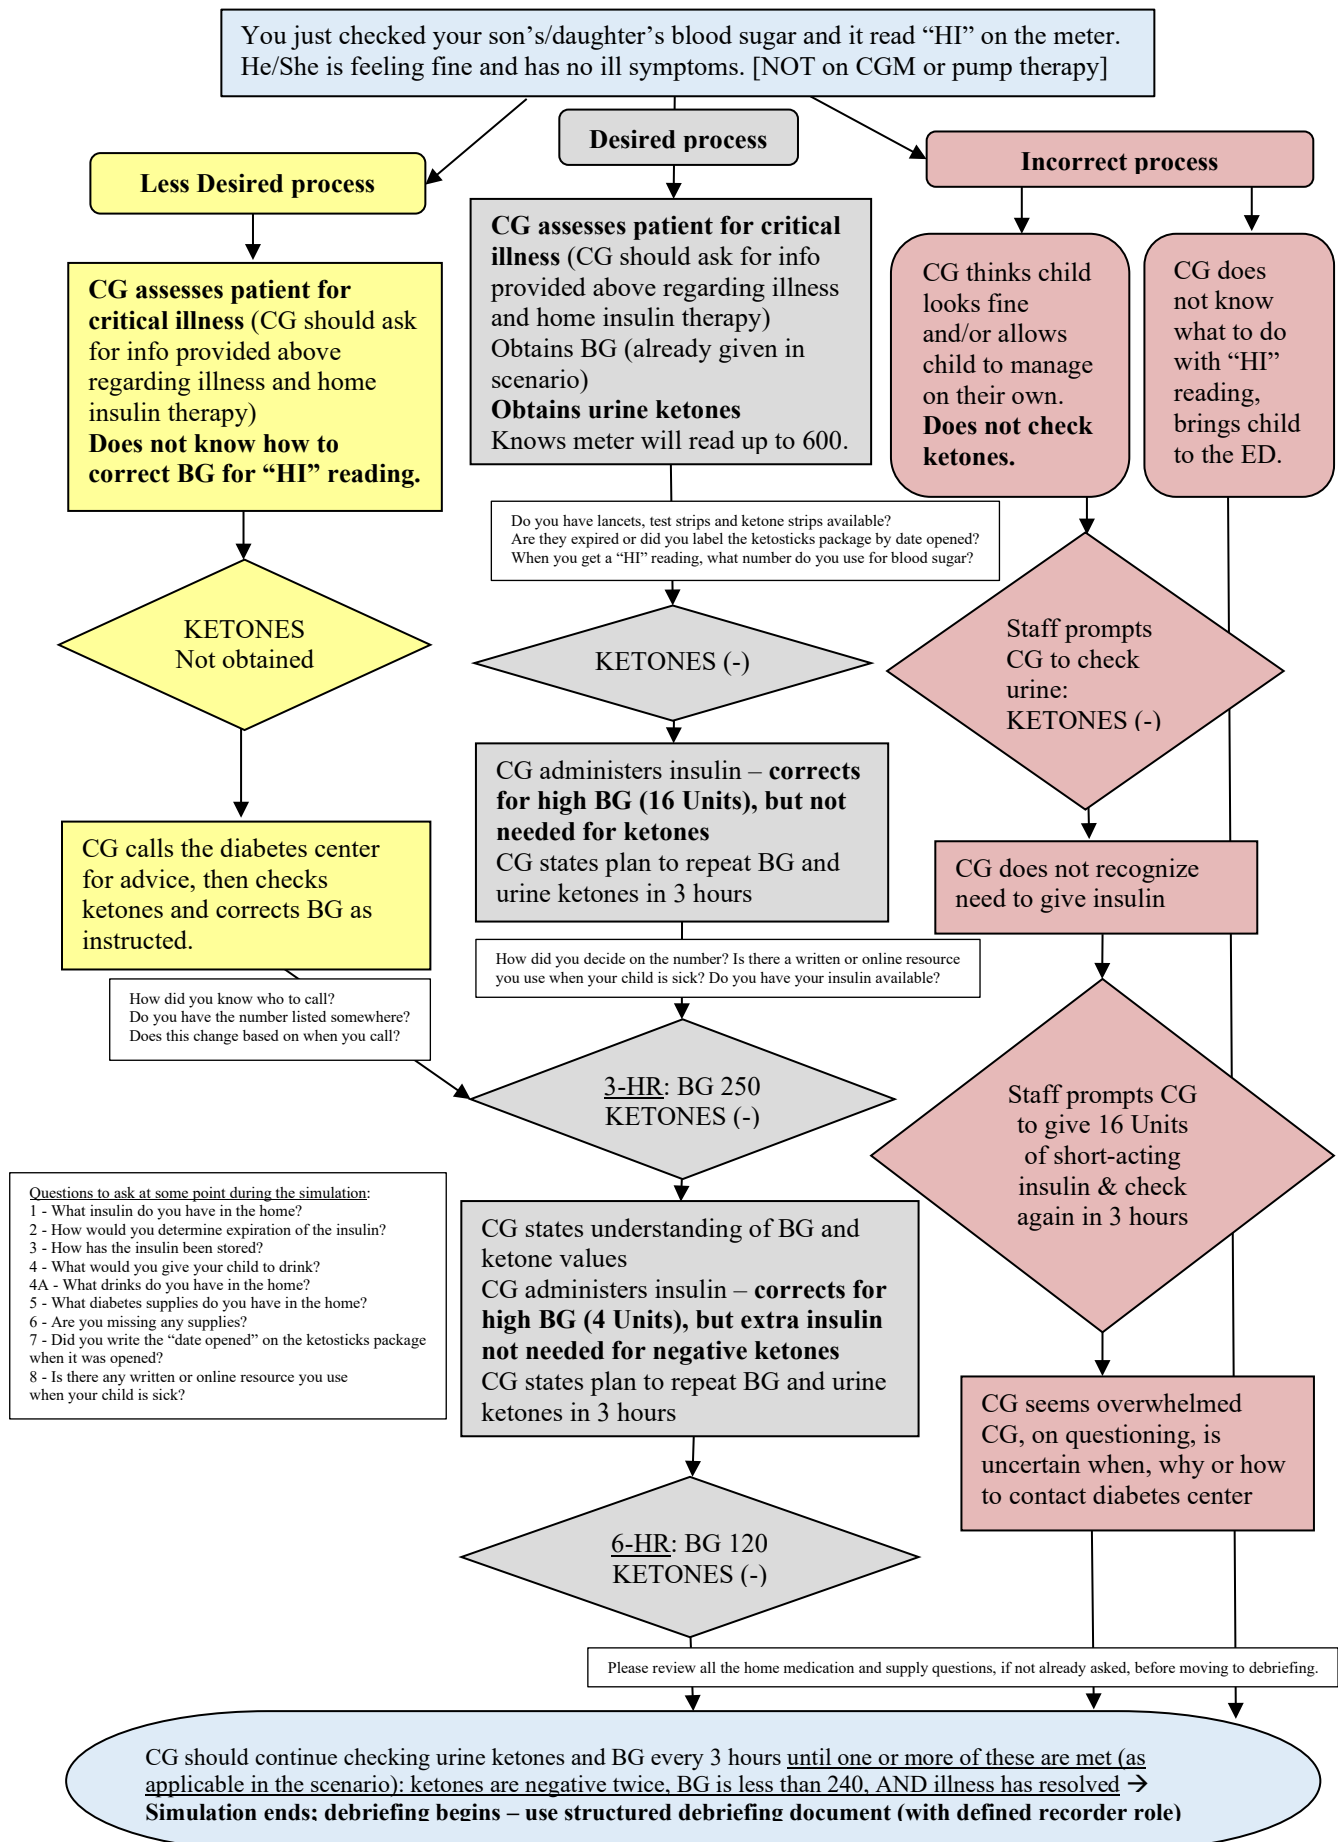

Supplement: Supplementary file 2 [file 1]
